# Supplementary material for: Evaluation of Cyclosaplin Efficacy Using a Silk Based 3D Tumor Model
Source: MDPI journal article supplement (doi:10.3390/biom9040123), 2019-03-28
Supplement: s1 [file s1]

Figure S1

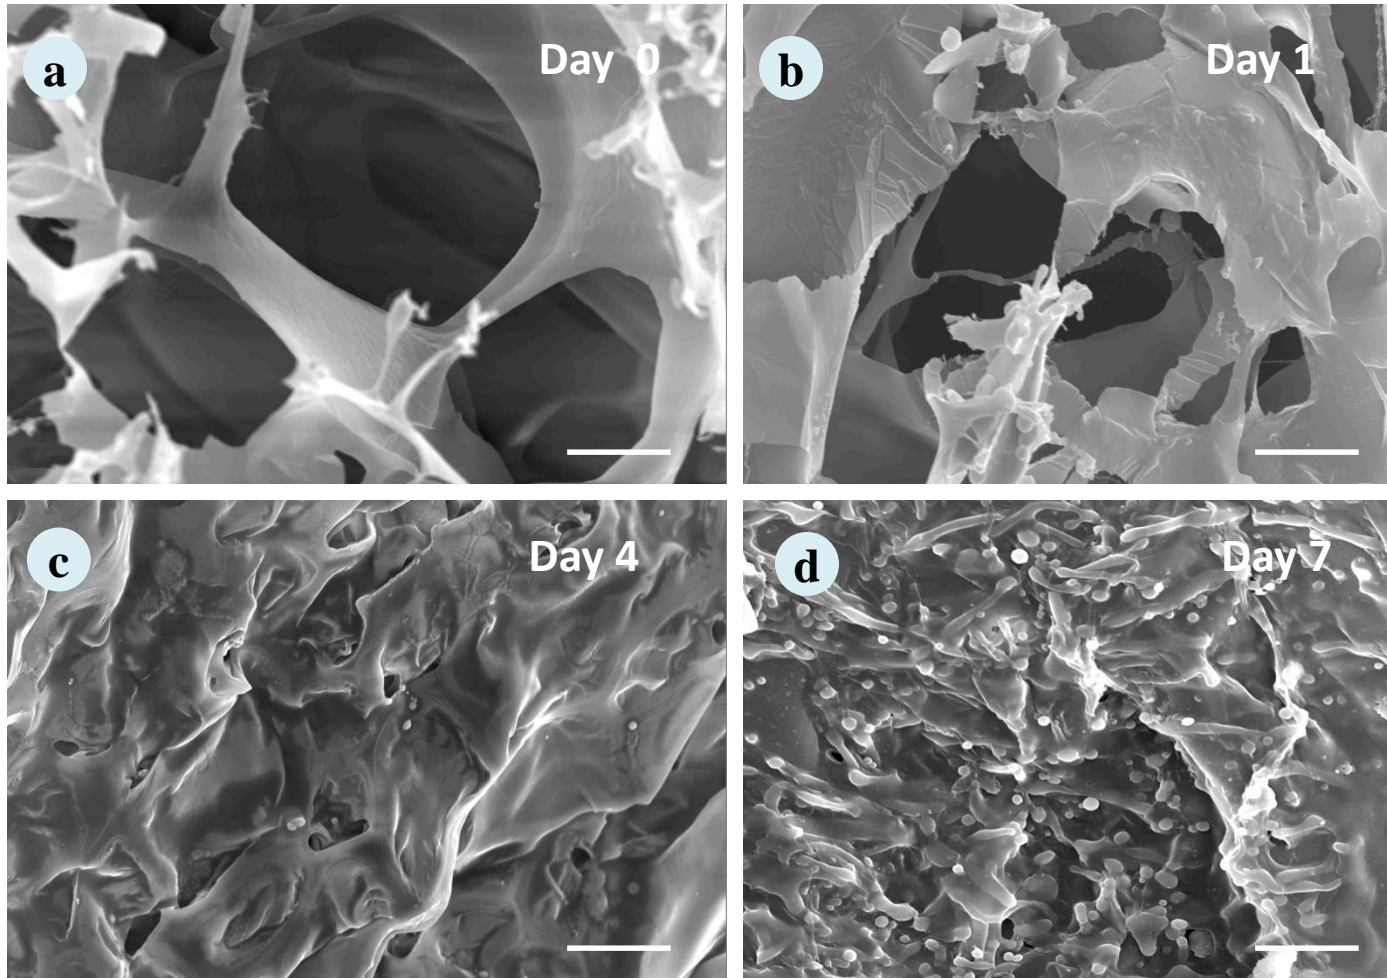

Fabrication of silk 3D Constructs. a) – d) MDA-MB-231 cells were grown on 3D silk constructs for 0, 1, 4, and 7 days
